# Supplementary material for: Synthesis of Peptide Nucleic Acids Containing a Crosslinking Agent and Evaluation of Their Reactivities
Source: PubMed Central journal article supplement (PMC6272193; doi:10.3390/molecules20034708), 2015-03-13
Supplement: molecules-20-04708-s001.pdf [file molecules-20-04708-s001.pdf]

# Supporting Information

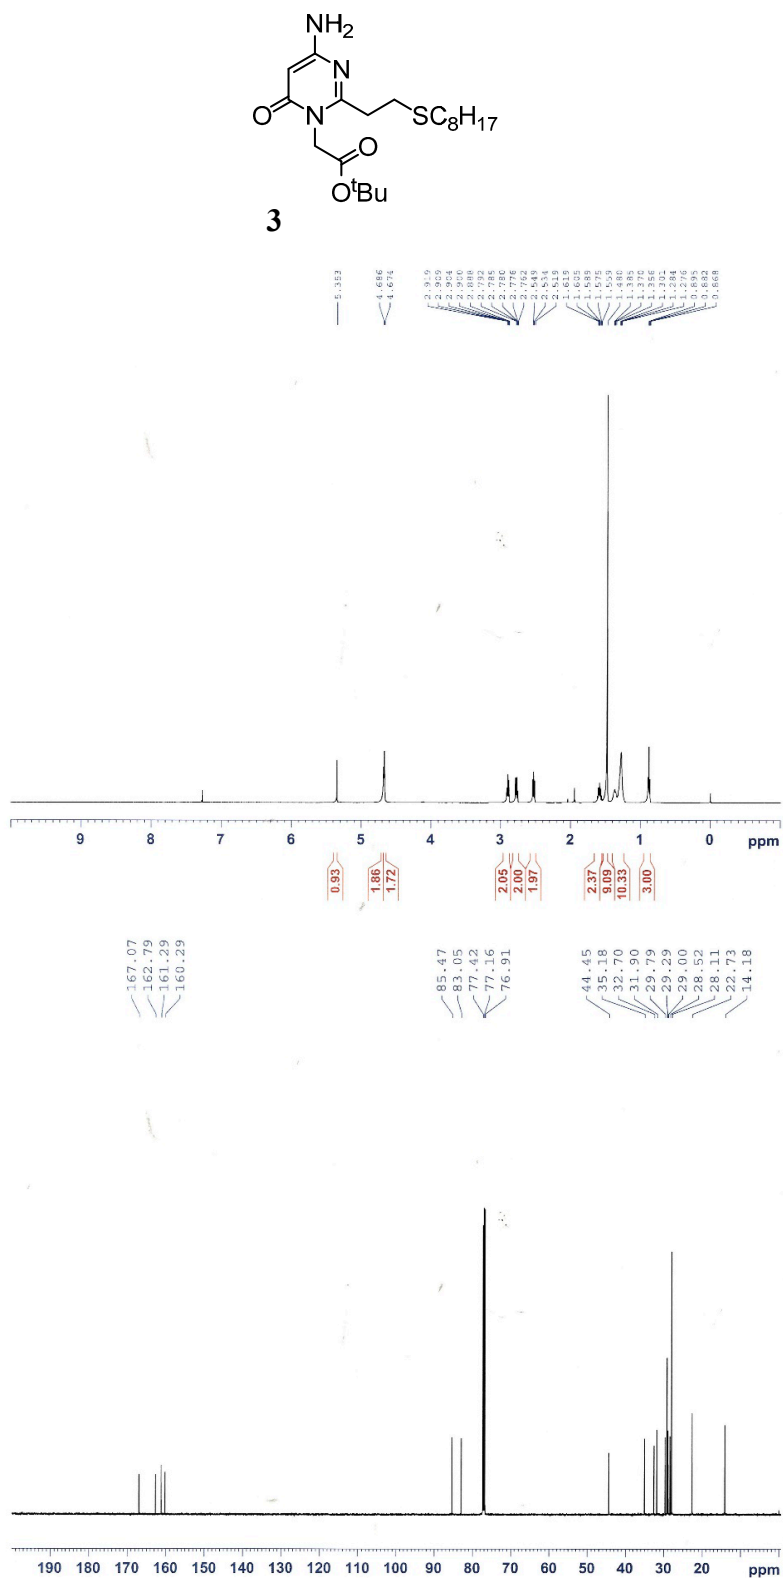

Figure S1. <sup>1</sup>H-NMR and <sup>13</sup>C-NMR spectra of **3**.



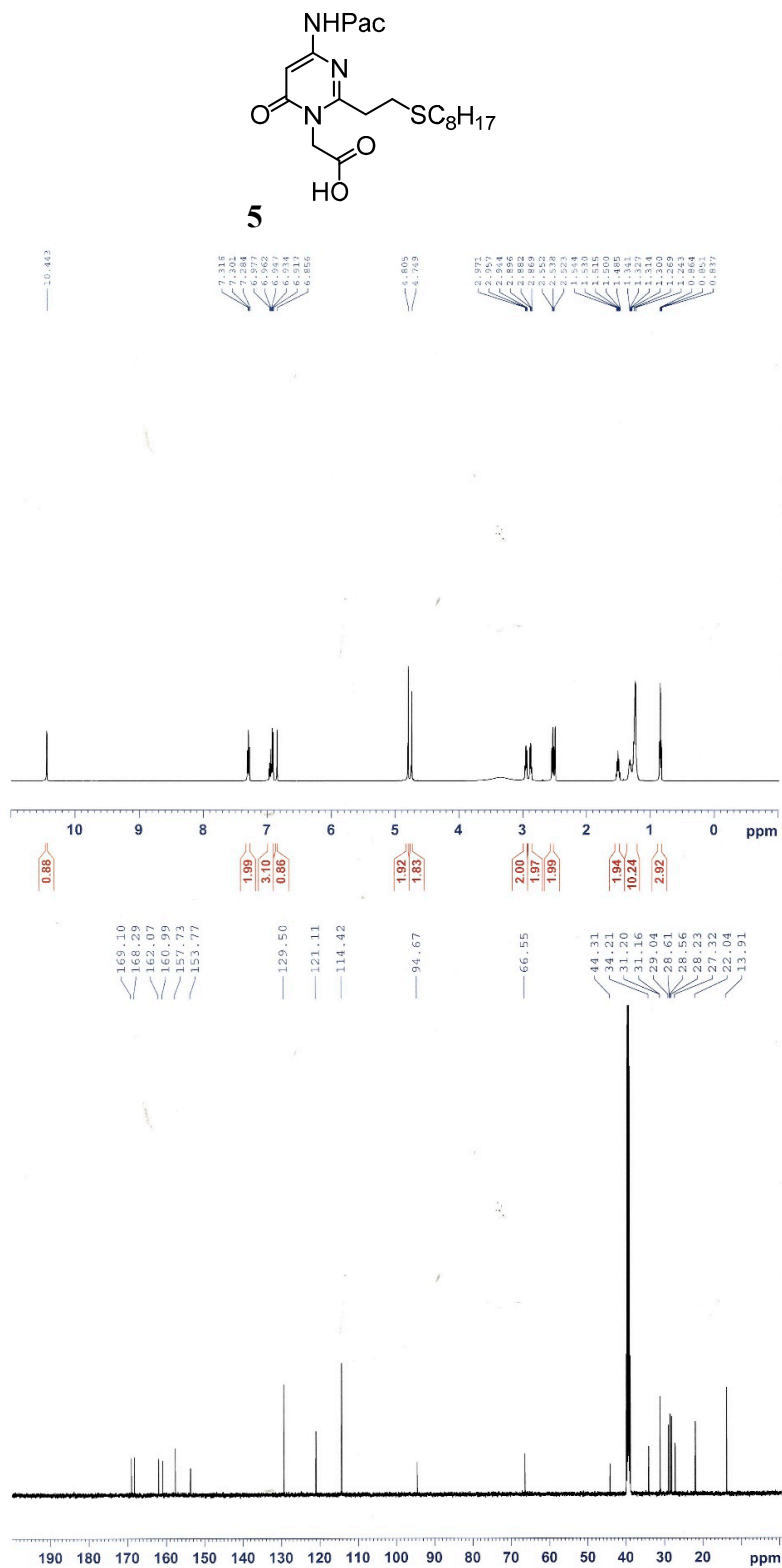

**Figure S3.** <sup>1</sup>H-NMR and <sup>13</sup>C-NMR spectra of **5**.

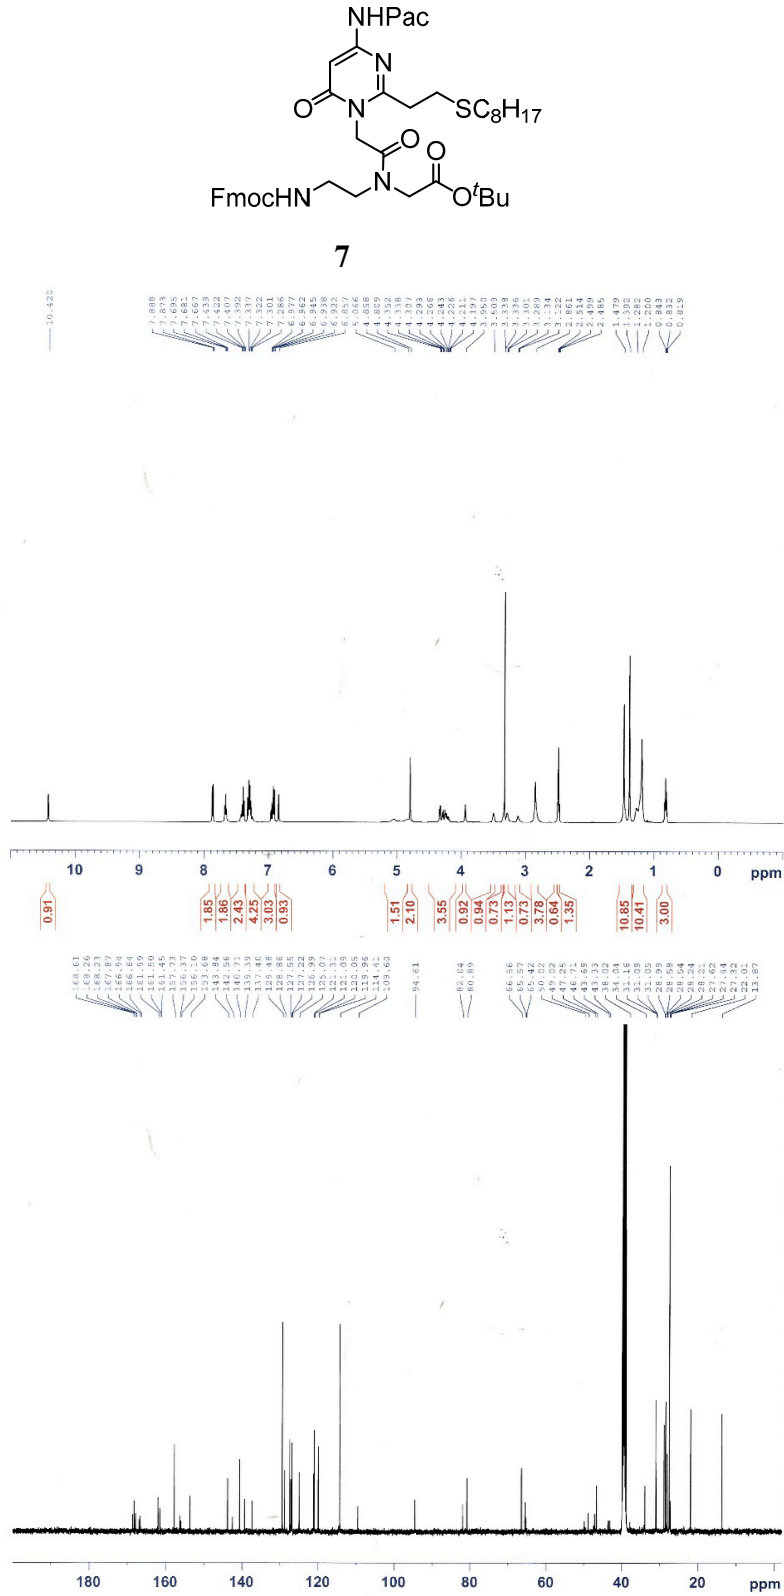

Figure S4. <sup>1</sup>H-NMR and <sup>13</sup>C-NMR spectra of **7**.

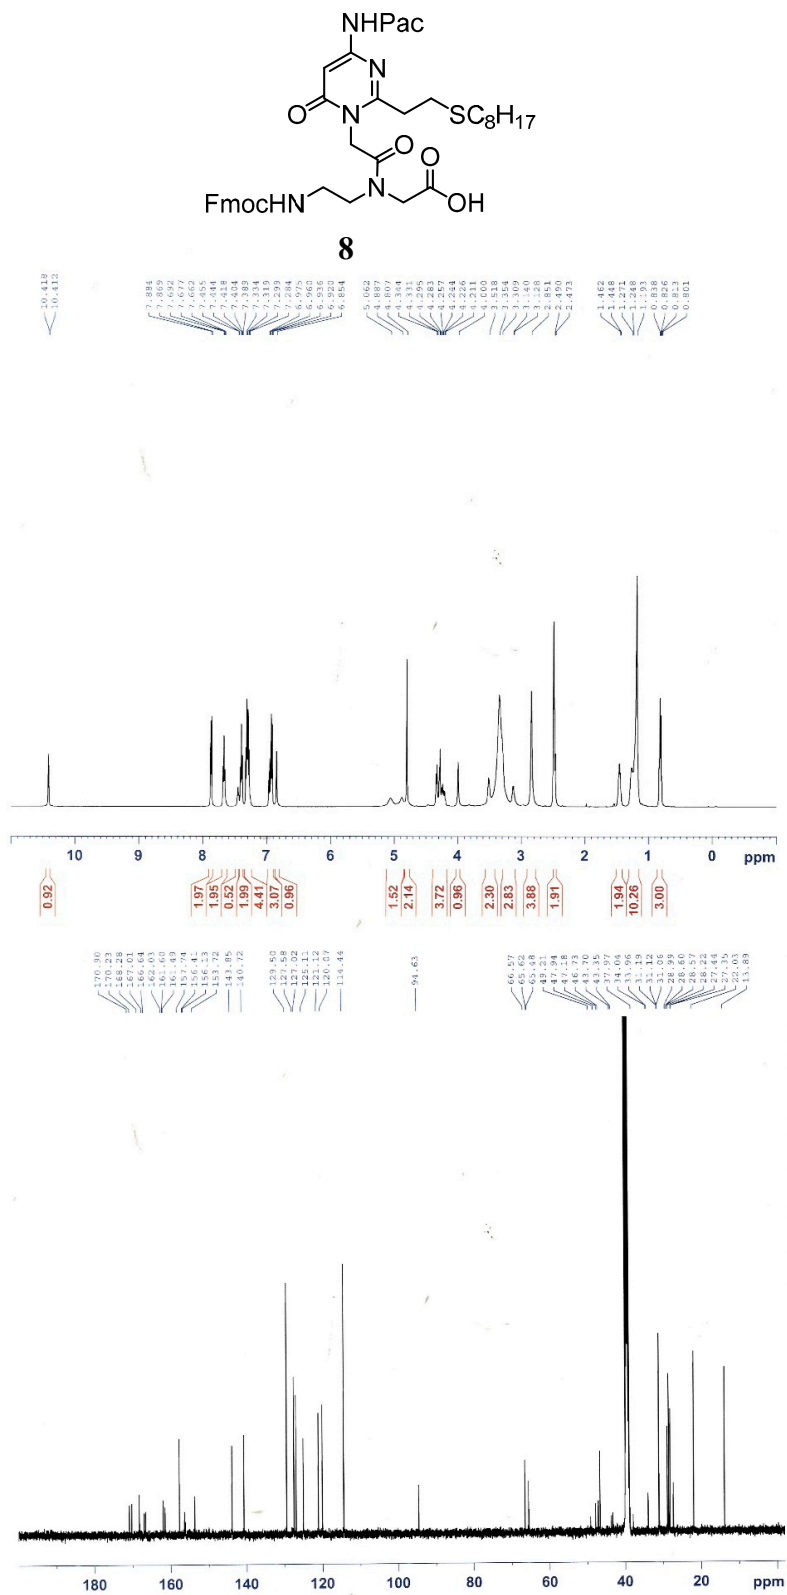

Figure S5. <sup>1</sup>H-NMR and <sup>13</sup>C-NMR spectra of **8**.

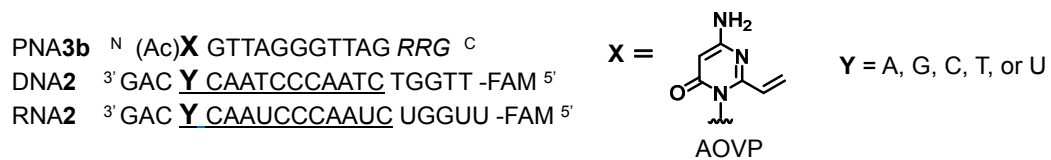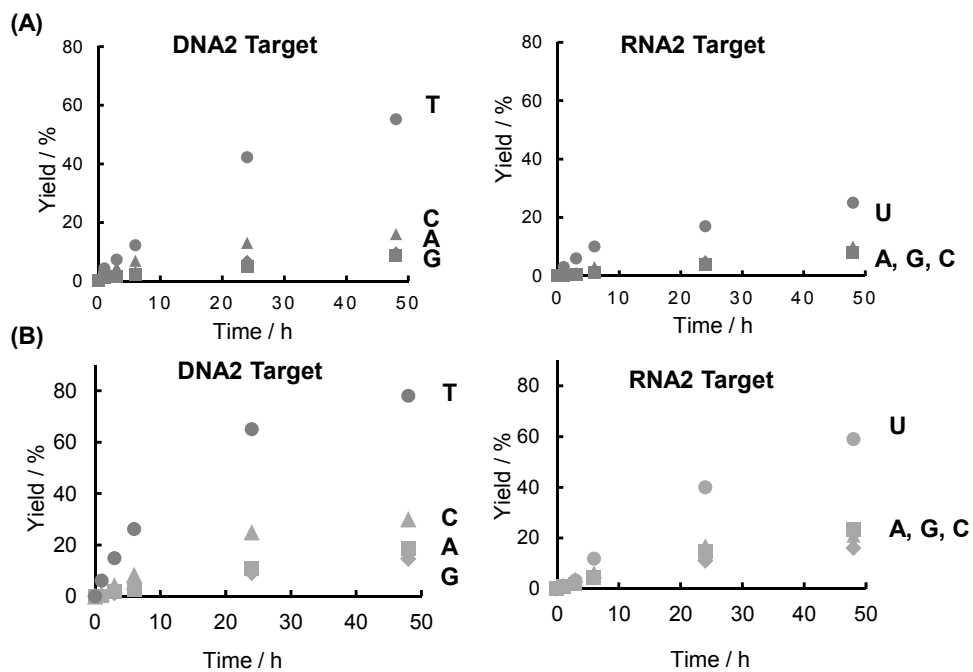

**Figure S6.** Time course of the crosslink yields with PNA3b at 37 °C (A) and 50 °C (B).

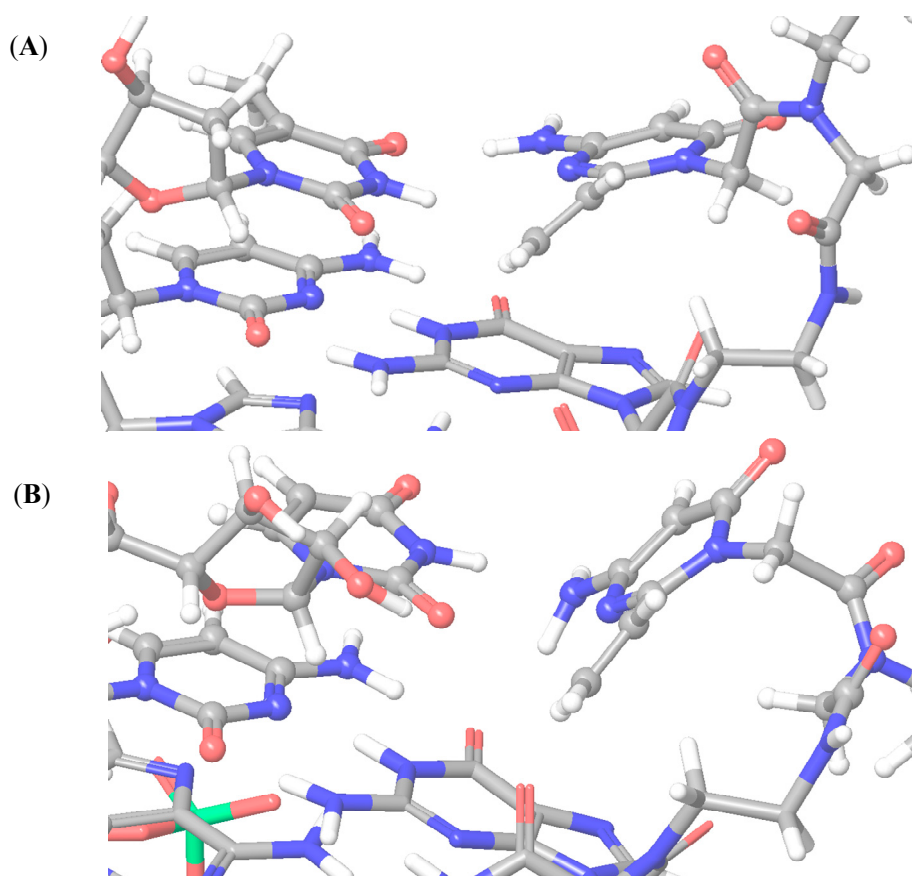

**Figure S7.** Molecular modeling of the complex in the PNA3b/DNA (A) and PNA3b/RNA (B). Molecular modeling of the complex was performed with MacroMoldel using OPLS2005 in water. These results suggested that AOVP in PNA might form the two hydrogen bonds with a target thymine in DNA and showed higher reactivity by the proximity effect. On the other hand, AOVP in PNA might not form the hydrogen bond with a target uracil in RNA. Thus, PNA3b might exhibit the higher reactivity with DNA than RNA.
